# Supplementary material
Source: PubMed Central journal article supplement (PMC150369)
Supplement: jamia_M1181_1.pdf [file jamia_M1181_1.pdf]

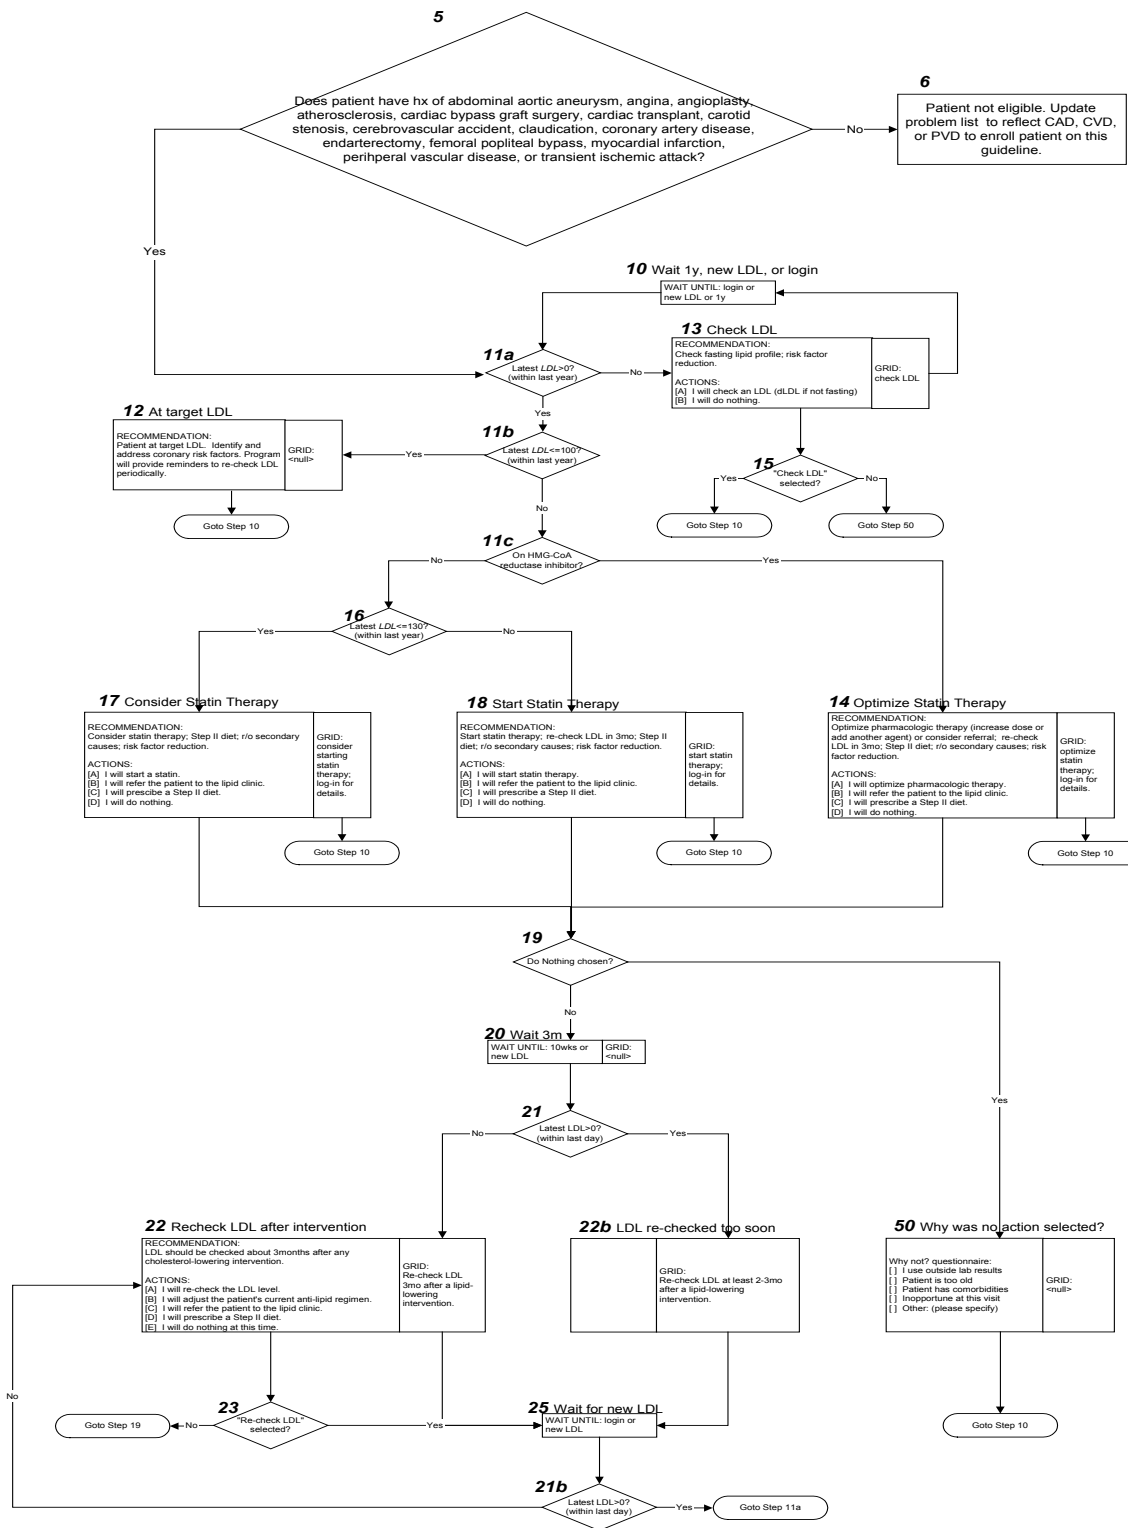

Figure 3. Flowchart (Visio®) specification of the NCEP secondary prevention guidelines, adapted from the published guidelines with local experts, and then entered into P-CAPE. Diamonds represent Decision steps, and rectangles Action steps. The ovals are re-directors that are actually defined within Action steps, but separated out here for clarity.
